# Supplementary material for: Nitration of arenes by 1-sulfopyridinium nitrate as an ionic liquid and reagent by in situ generation of NO2
Source: Royal Society of Chemistry journal article supplement (doi:10.1039/c6ra15922b), 2016-01-01

## Nitration of arenes by 1-sulfofpyridinium nitrate as an ionic liquid and reagent by *in situ* generation of NO<sub>2</sub>

Ahmad Reza Moosavi-Zare,<sup>\*a</sup> Mohammad Ali Zolfigol,<sup>b</sup> Mahmoud Zarei,<sup>b</sup> Ehsan noroozizadeh<sup>b</sup>  
and M. Hassan Beyzavi<sup>c</sup>

<sup>a</sup>*Sayyed Jamaledin Asadabadi University, Asadabad, 6541835583, I. R. Iran.*

<sup>b</sup>*Faculty of Chemistry, Bu-Ali Sina University, Hamedan, 6517838683, I. R. Iran.*

<sup>c</sup>*Department of Chemistry and Chemical Biology, Harvard University, 12 Oxford St., Cambridge MA 02138, USA*

*Corresponding authors: Fax: +98 811 8272404; e-mail addresses: moosavizare@yahoo.com & mzolfigol@yahoo.com.*

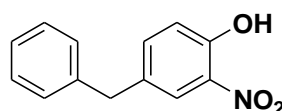

2-nitro-4-benzyl phenol (9). Yellow solid; isolated yield 81% (0.14g). IR (KBr) cm<sup>-1</sup>; 1309, 1542, 2960, 3028, 3248, ; <sup>1</sup>H NMR (300 MHz, CDCl<sub>3</sub>) δ (ppm) 3.98 (s, 2H), 7.10 (d, *J* = 6 Hz, 1H), 7.18 (d, *J* = 6.0 Hz, 2H), 7.25 (s, 1H), 7.31-7.35 (m, 2H), 7.41-7.44 (m, 1H); 7.94-7.95 (d, *J* = 3 Hz, 1H), 10.5 (s, 1H); <sup>13</sup>C NMR (75 MHz, CDCl<sub>3</sub>) δ (ppm) 60.4, 120.07, 122.66, 124.4, 126.67, 128.79, 133.77, 138.43, 172.32.

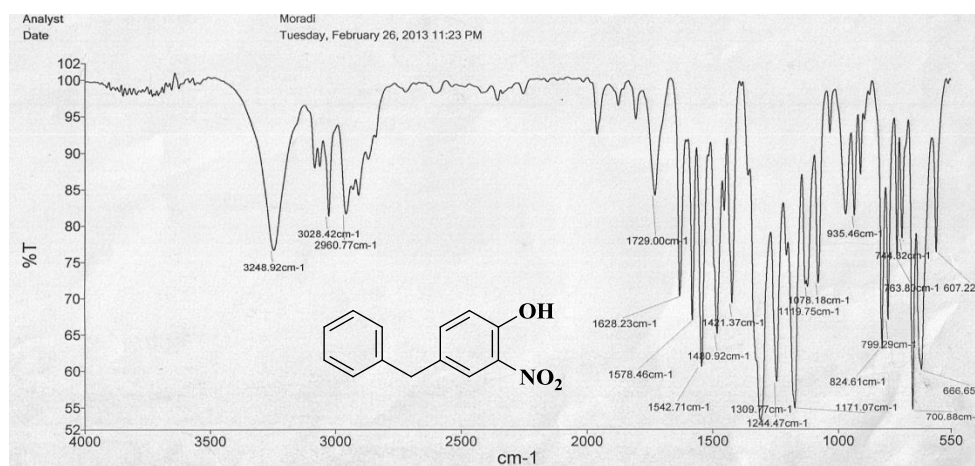

FT IR : 2-nitro-4-benzyl phenol

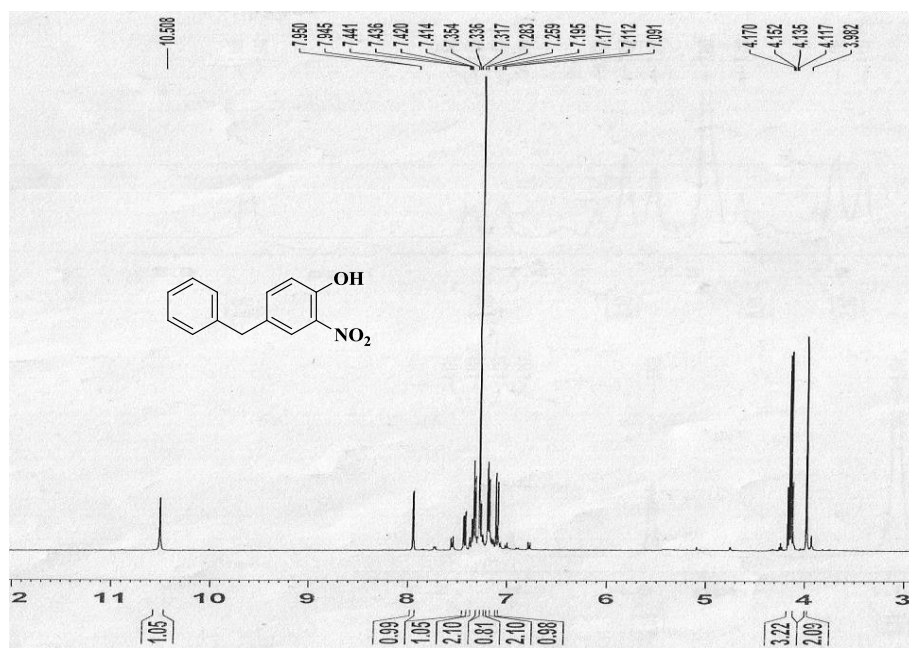

$^1\text{H NMR}$  : 2-nitro4-benzyl phenol

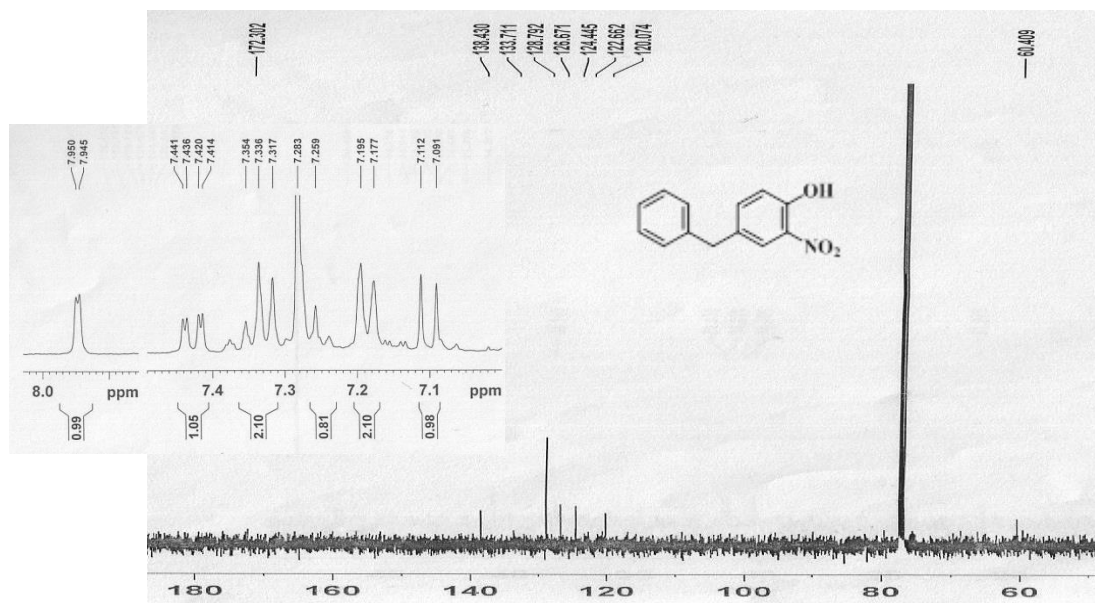

$^{13}\text{C NMR}$  : 2-nitro4-benzyl phenol

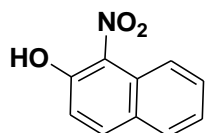

1-nitronaphthalene-2-ol (4). Yellow solid; isolated yield 92% (0.174 g). IR (KBr) 717, 1378, 1543, 3418  $\text{cm}^{-1}$ ;  $^1\text{H NMR}$  (300 MHz,  $\text{CDCl}_3$ )  $\delta$  (ppm) 7.34 (d,  $J = 9$  Hz, 1H), 7.46 (t,  $J = 12$  Hz, 1H),

7.55-7.66 (m, 2H), 7.97 (d,  $J = 6$  Hz, 1H), 8.03 (d,  $J = 9$  Hz, 1H), 11.44 (s, 1H, OH);  $^{13}\text{C}$  NMR (75 MHz,  $\text{CDCl}_3$ )  $\delta$  (ppm) 118.8, 119.8, 124.9, 125.7, 127.3, 128.8, 129.5, 132.9, 133.6, 148.8.

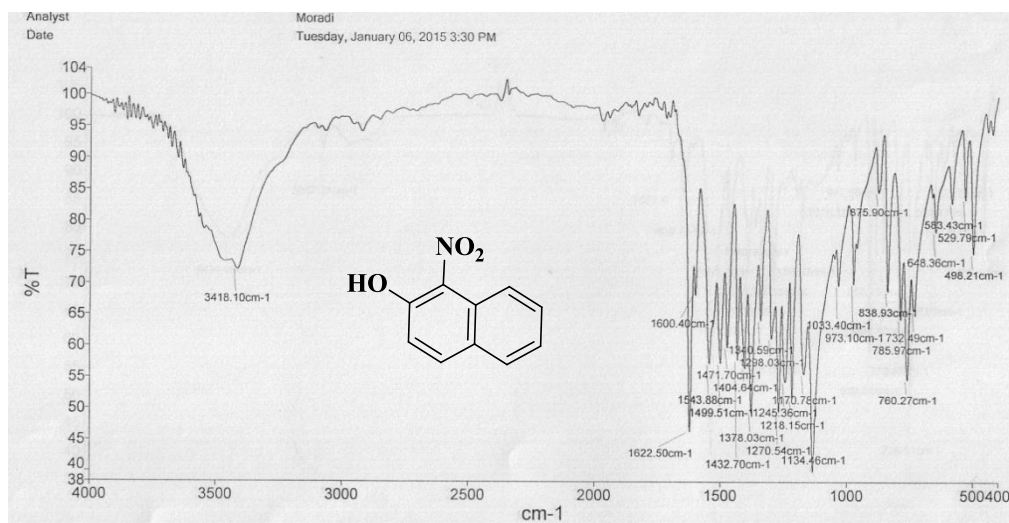

FT IR: 1-nitronaphthalene-2-ol

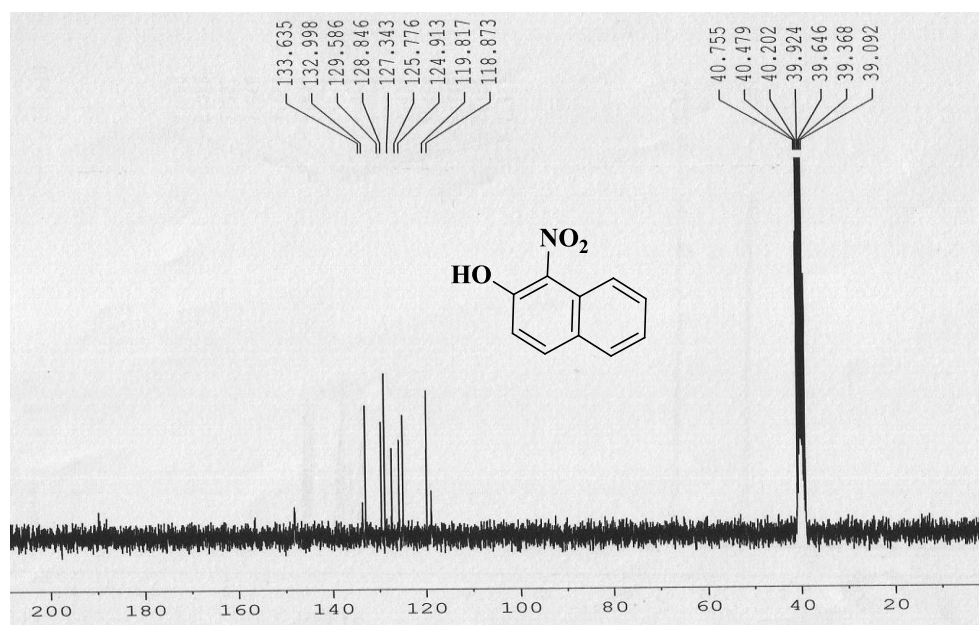

$^{13}\text{C}$  NMR :1-nitronaphthalene-2-ol

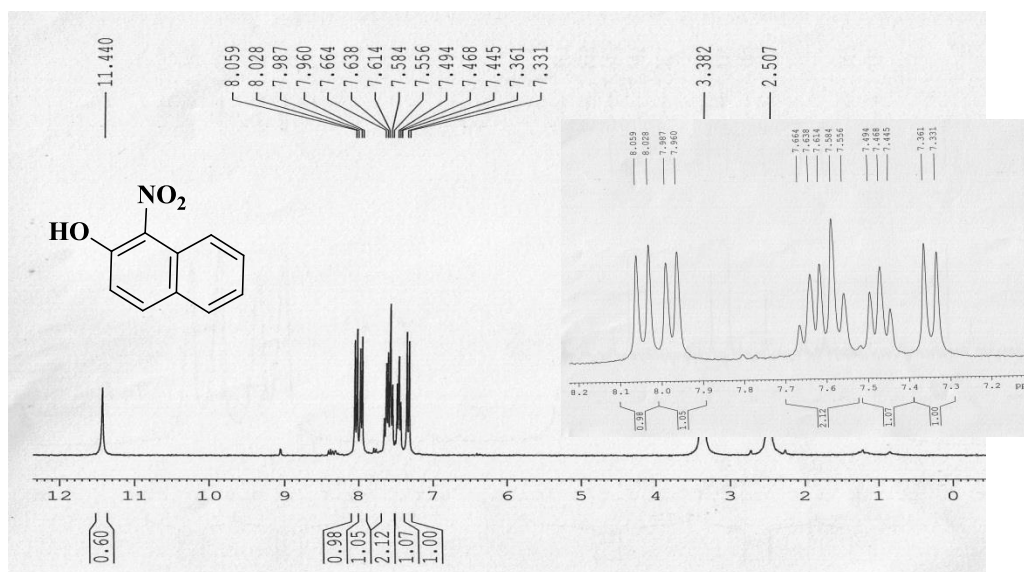

<sup>1</sup>H NMR :1-nitronaphthalene-2-ol

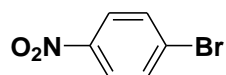

1- bromo4-nitrobenzene (12). Yellow solid; isolated yield 80% (0.15 g); <sup>1</sup>H NMR (300 MHz, DMSO-*d*<sub>6</sub>) δ (ppm) 7.72 (d, *J* = 9.0 Hz, 2H), 8.22 (d, *J* = 9.0 Hz, 2H); <sup>13</sup>C NMR (75 MHz, DMSO-*d*<sub>6</sub>) δ (ppm) 124.3, 131.0, 146.1, 147.5.

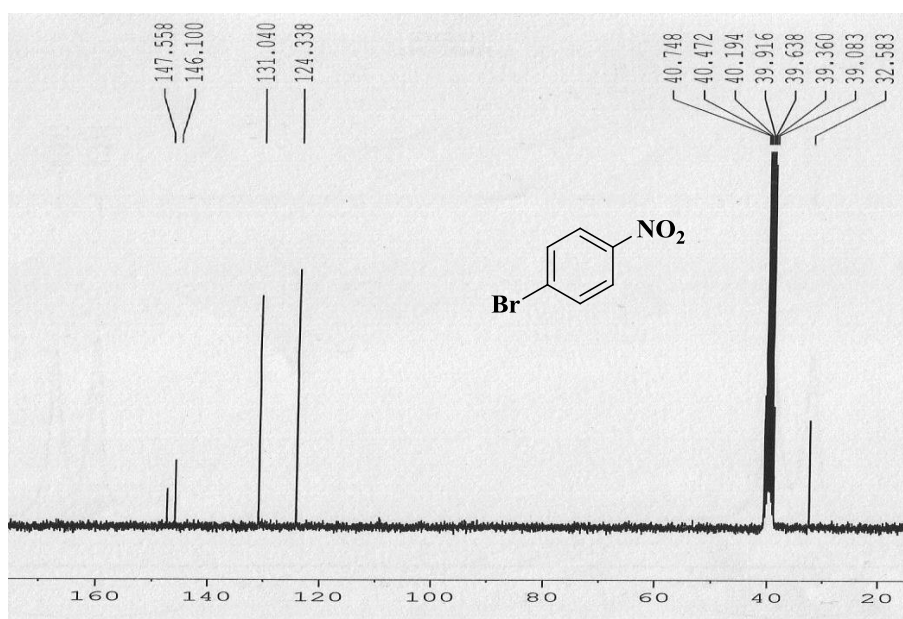

<sup>13</sup>C NMR: 1- bromo4-nitrobenzene

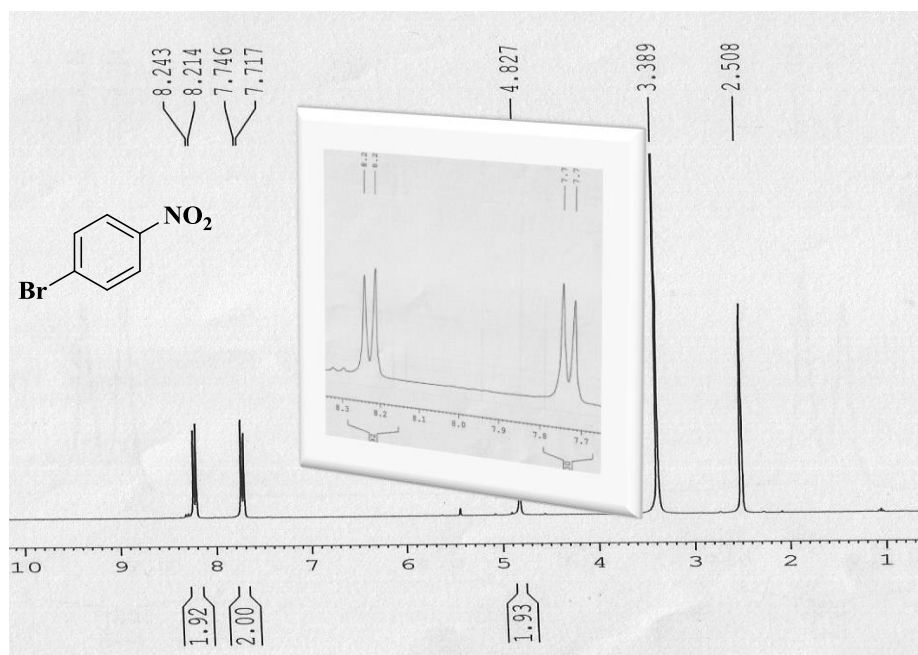

$^1\text{H}$  NMR: 1-bromo4-nitrobenzene

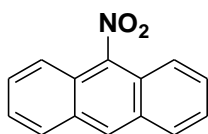

9-nitroanthracene (8). Yellow solid; isolated yield 83% (0.1825 g). IR (KBr) 692, 1371, 1516  $\text{cm}^{-1}$ ;  $^1\text{H}$  NMR (300 MHz,  $\text{CDCl}_3$ )  $\delta$  (ppm) 7.7-7.2 (m, 2H), 7.72 (t,  $J = 10.8$  Hz, 2H), 7.89 (d,  $J = 9$  Hz, 2H), 8.29 (d,  $J = 9$  Hz, 2H), 9.01 (s, 1H);  $^{13}\text{C}$  NMR (75 MHz,  $\text{CDCl}_3$ )  $\delta$  (ppm) 120.9, 122.09, 127.08, 129.2, 130.2, 130.7, 131.5, 144.9.

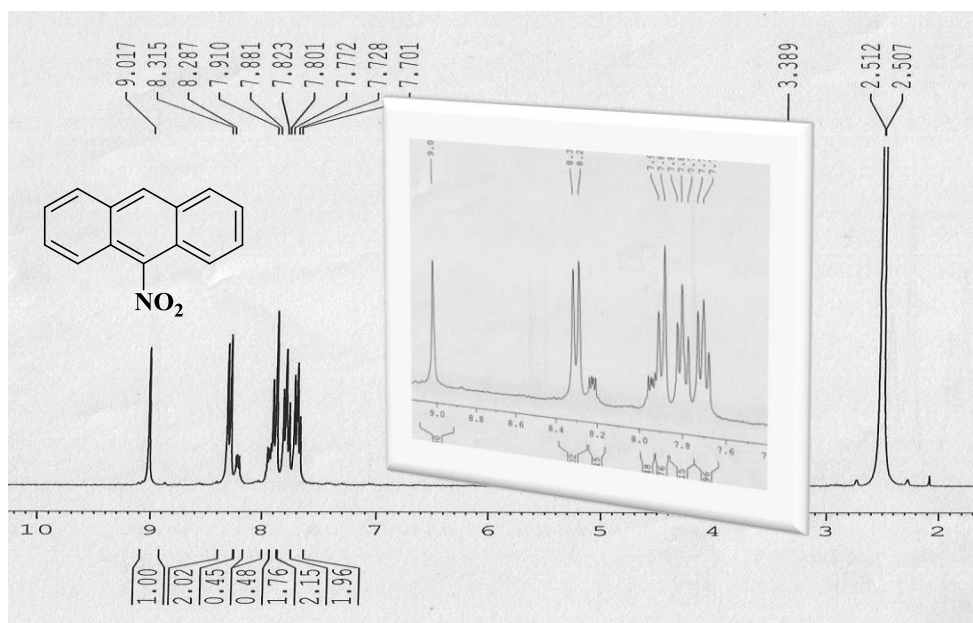

<sup>1</sup>H NMR: 9-nitroanthracene

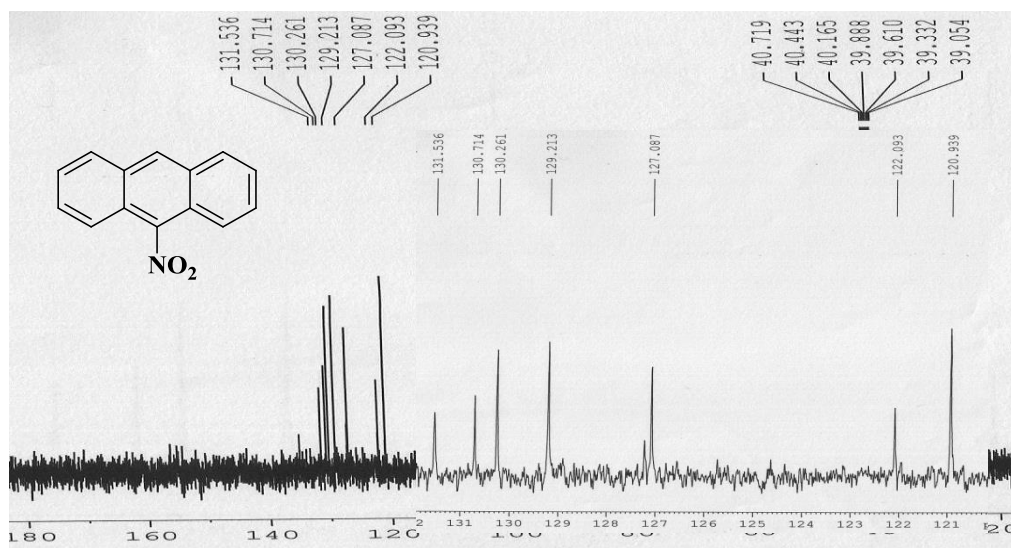

<sup>13</sup>C NMR: 9-nitroanthracene

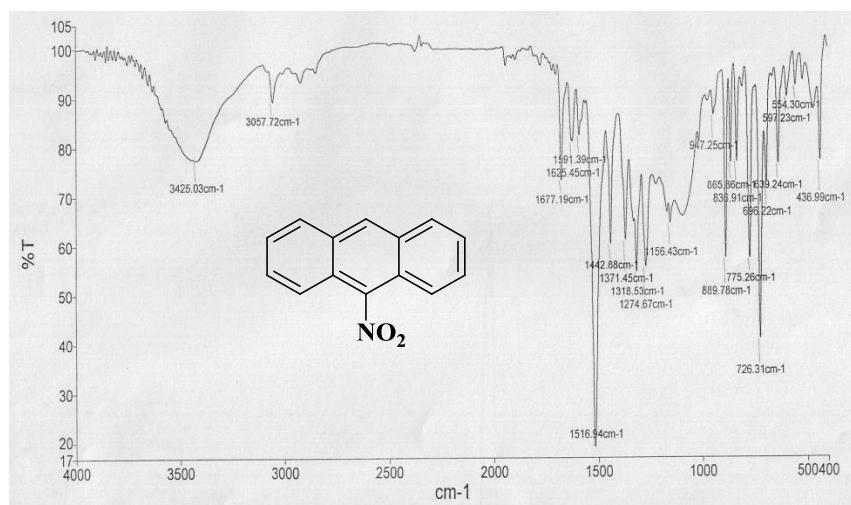

FT IR: 9-nitroanthracene

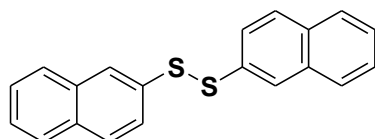

1-(naphthalen-2-yl)-2-(naphthalen-6-yl)disulfane (13). Brown solid; isolated yield 75%; <sup>1</sup>H NMR (400 MHz, DMSO-*d*<sub>6</sub>) δ (ppm) 7.52 (m, 4H), 7.67 (q, *J* = 1.6 Hz, 2H), 7.91 (m, 6H), 8.14 (d, *J* = 1.2 Hz, 2H); <sup>13</sup>C NMR (100 MHz, DMSO-*d*<sub>6</sub>) δ (ppm) 125.2, 126.1, 126.5, 127.07, 127.3, 127.7, 129.3, 132.0, 132.9, 133.05.

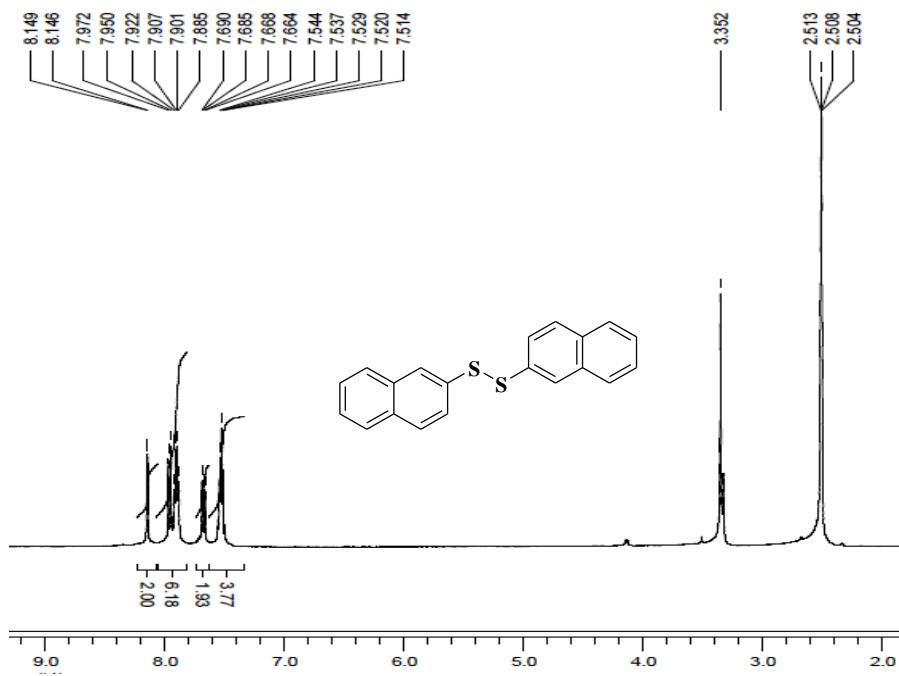

<sup>1</sup>H NMR: 1-(naphthalen-2-yl)-2-(naphthalen-6-yl)disulfane

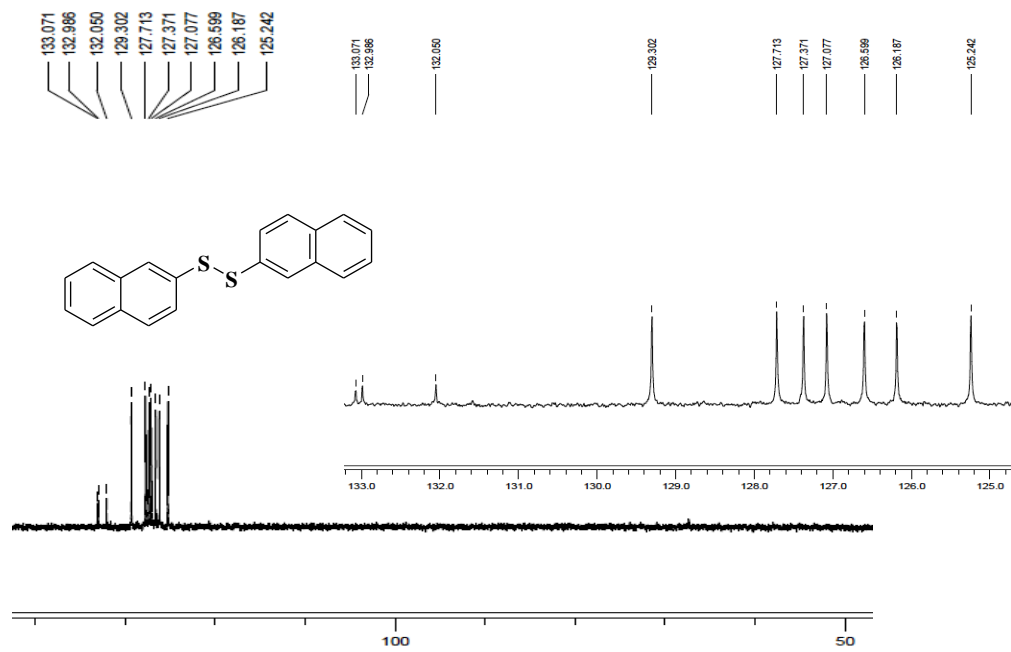

<sup>13</sup>C NMR: 1-(naphthalen-2-yl)-2-(naphthalen-6-yl)disulfane



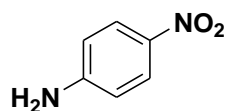

4-nitroaniline (10b). Yellow solid; isolated yield 40% (0.0549 g). IR (KBr) 840, 1298, 1587, 3360, 3481  $\text{cm}^{-1}$ ;  $^1\text{H}$  NMR (400 MHz,  $\text{DMSO-}d_6$ )  $\delta$  (ppm) 6.61 (d,  $J=8$  Hz, 2H), 6.73 (s, 2H), 7.95 (d,  $J=8.4$  Hz, 2H);  $^{13}\text{C}$  NMR (100 MHz,  $\text{DMSO-}d_6$ )  $\delta$  (ppm) 112.32, 126.34, 135.59, 155.49.

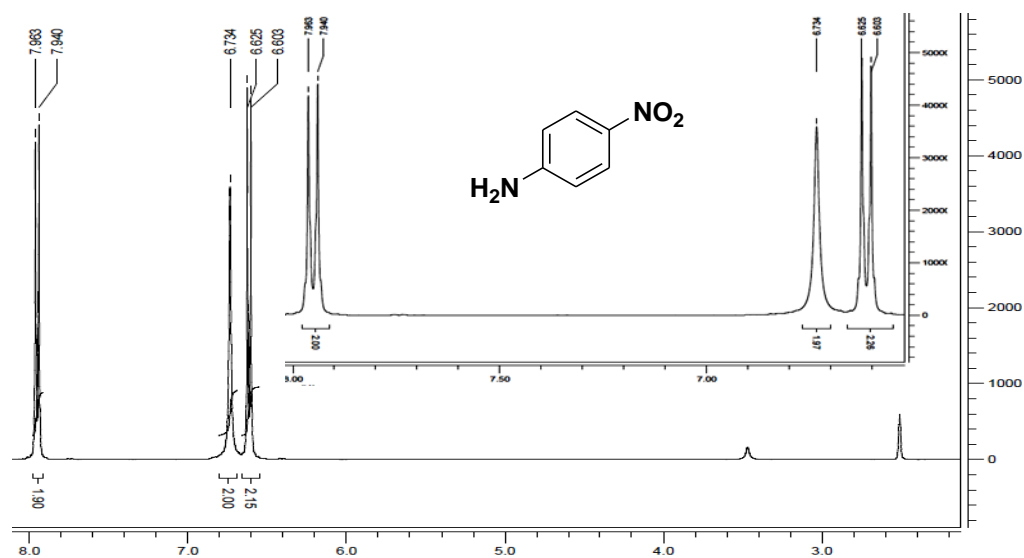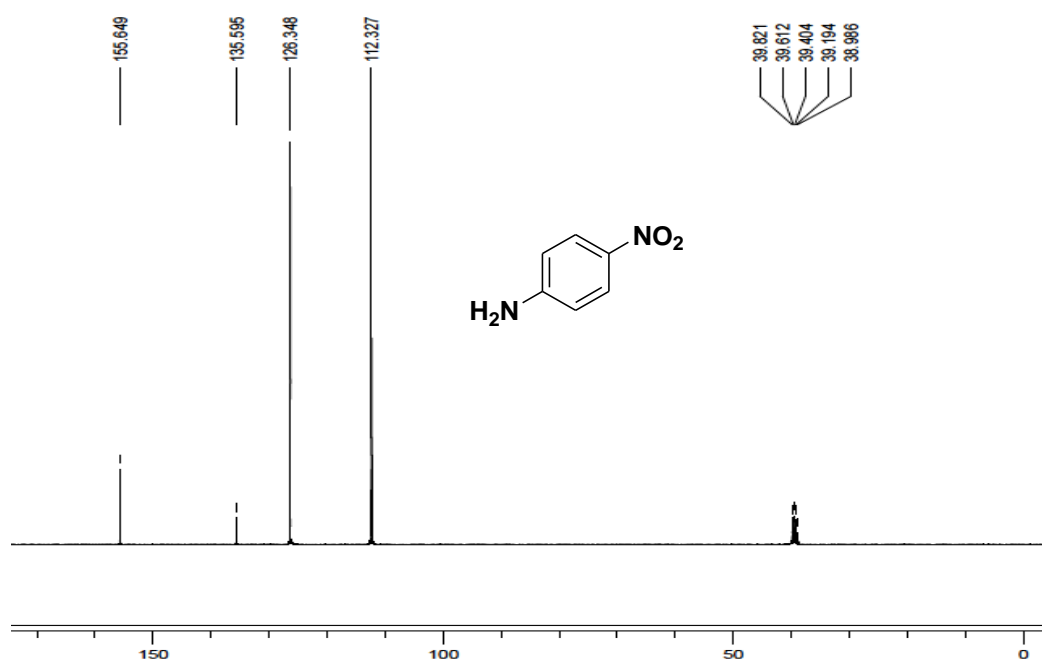



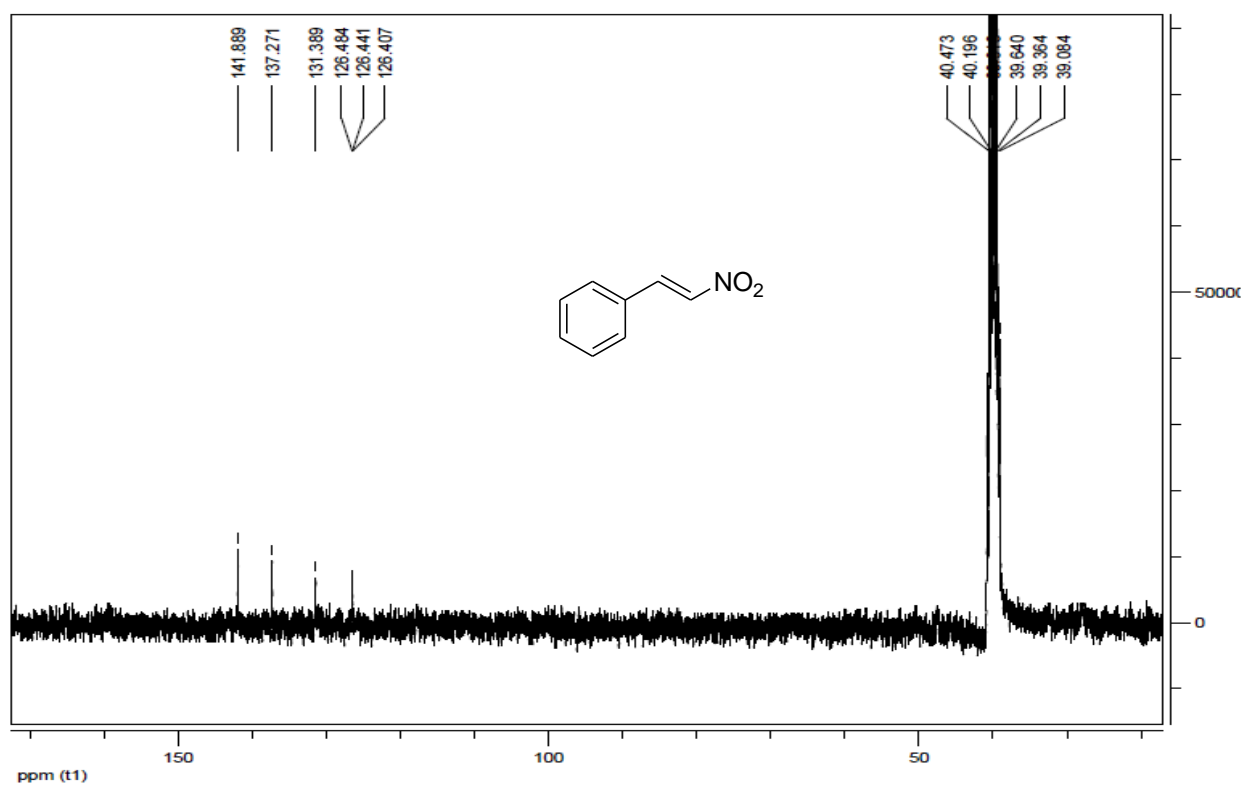

Supplement: c6ra15922b1.pdf [file c6ra15922b1.pdf]
